# Supplementary material for: A survey of people with foot problems related to rheumatoid arthritis and their educational needs
Source: Springer Nature journal article supplement (doi:10.1186/s13047-017-0193-6), 2017-01-01
Supplement: MOESM1 [file 12115676]

# Rheumatoid Arthritis foot health education survey for patients

Showing 543 of 543 responses

Showing **all** responses

Showing **all** questions

## Section 1

### 1 Are you

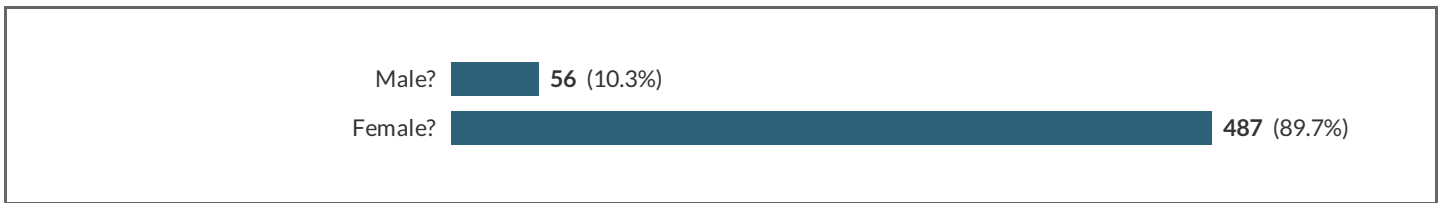

### 2 What is your current age? From the options below please select the age range that your birth date falls within.

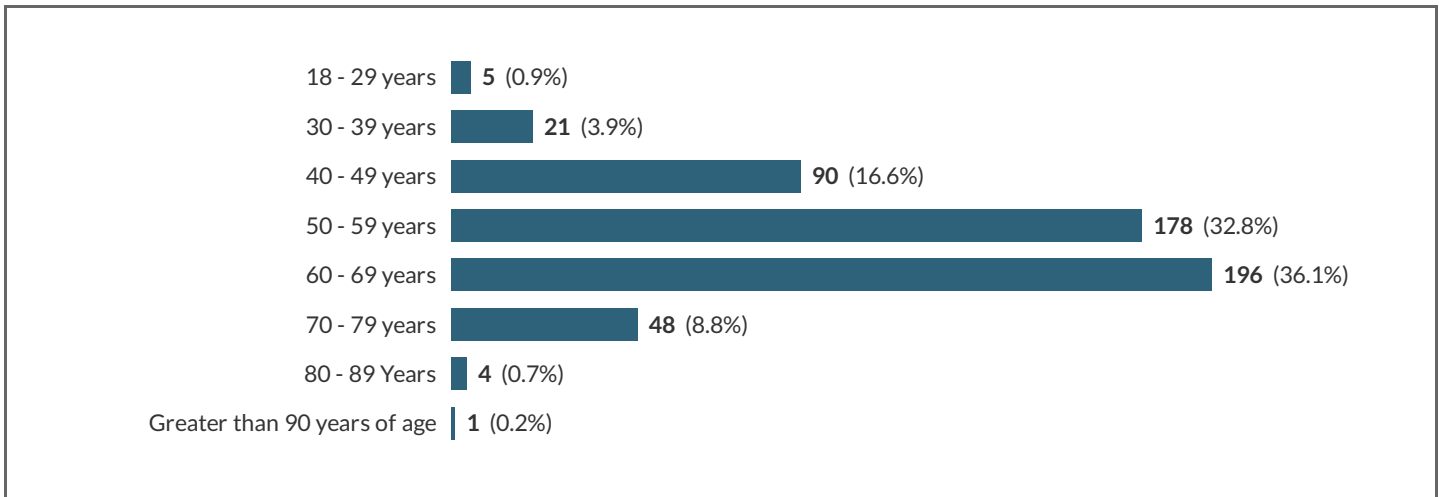

### 3 Disease duration. Please tell us how long you have been diagnosed with RA by selecting from the options below.

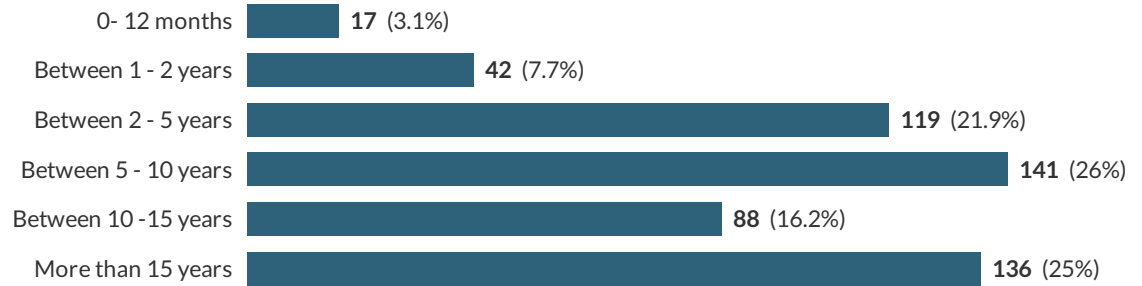

**4** Do you live?

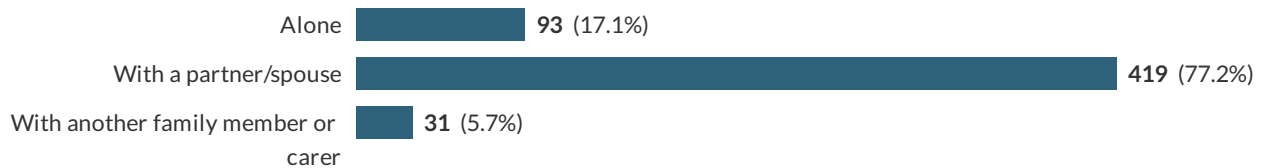

**5** Do you currently receive podiatry/chiropractic treatment?

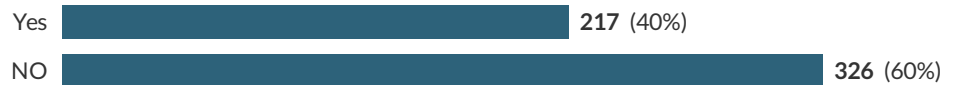

**6** If you answered YES to question 5, does your podiatrist/chiropractor work in the?

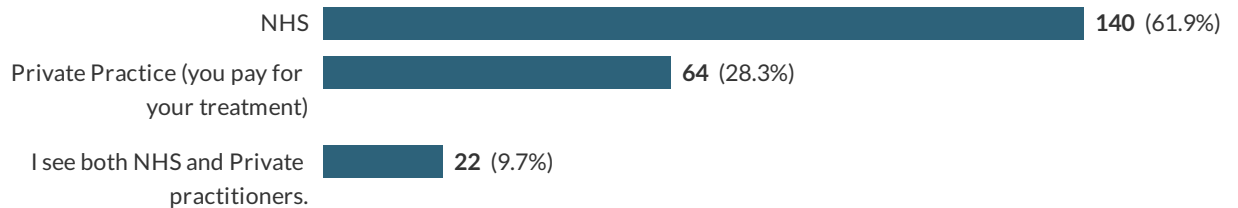

**7** Which part of the UK do you mainly live in? (select ONE area only)

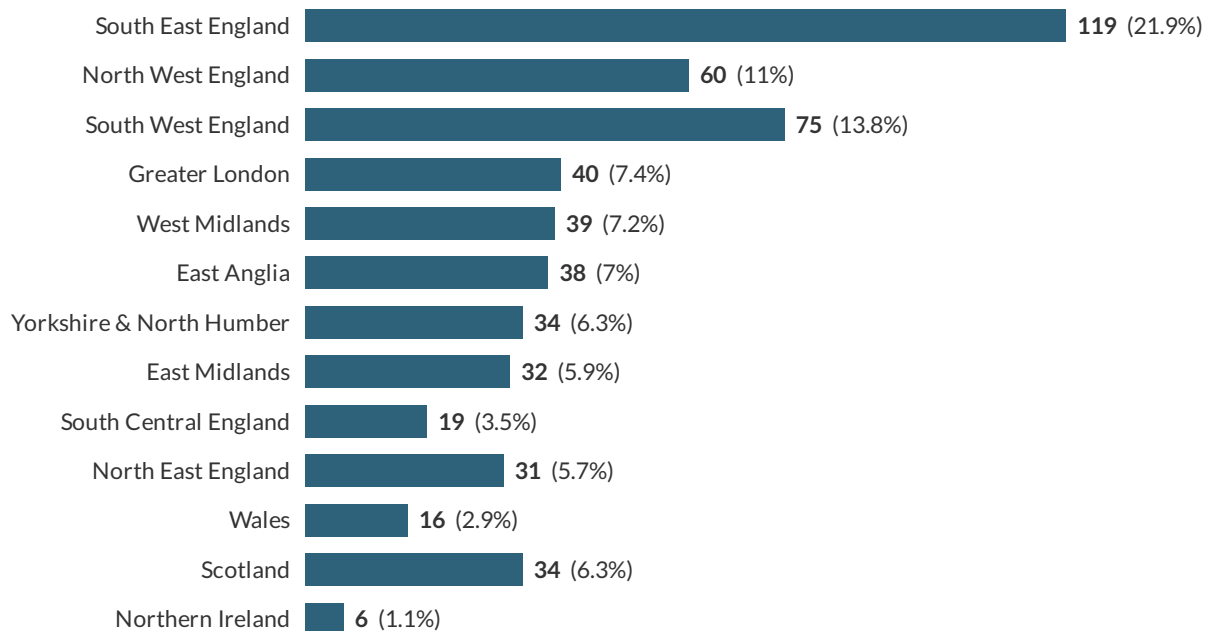

## Section 2: The aims of foot health education.

**8** To what extent do you agree with the following statements about the AIMS of foot health education. Please select your responses below

**8.1** So I understand about the treatments I give consent for

**8.1.a** So I understand about the treatments I give consent for - Select the extent to which you agree

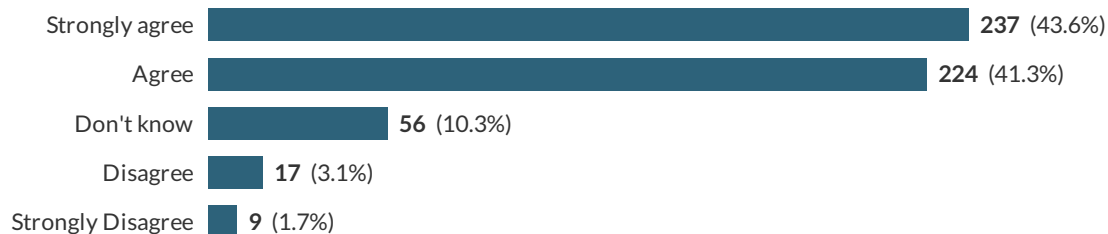

**8.2** To allow me to make informed choices about my treatment options

**8.2.a** To allow me to make informed choices about my treatment options - Select the extent to which you agree

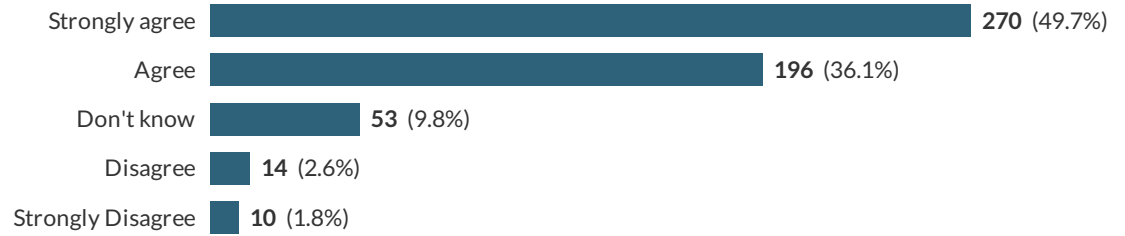

8.3 To enable me to look after my own foot health safely

8.3.a To enable me to look after my own foot health safely - Select the extent to which you agree

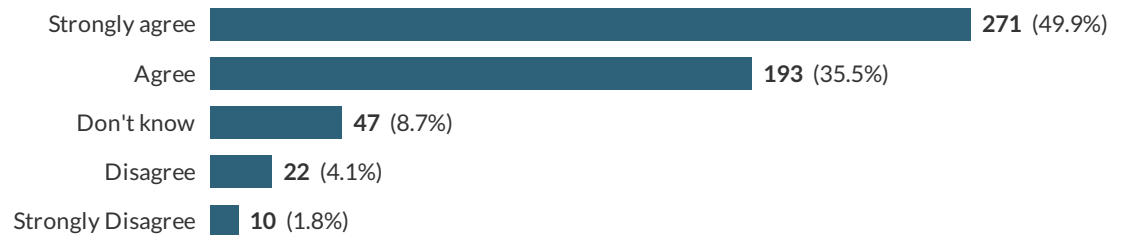

8.4 To educate me about how RA can affect my feet

8.4.a To educate me about how RA can affect my feet - Select the extent to which you agree

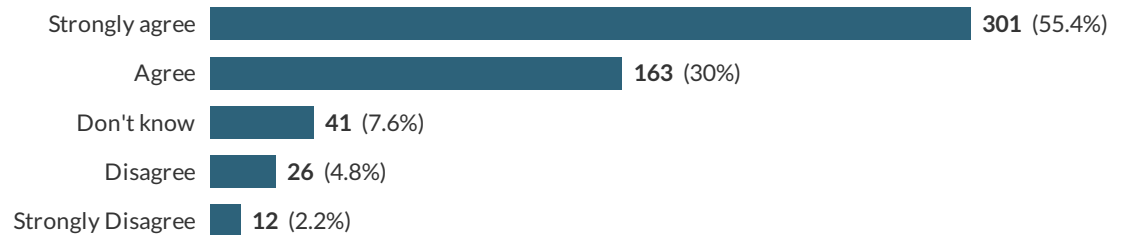

8.5 To inform me about information resources I can access such as websites or support groups (e.g. NRAS, Arthritis Care, Arthritis Research UK)

8.5.a To inform me about information resources I can access such as websites or support groups (e.g. NRAS, Arthritis Care, Arthritis Research UK) - Select the extent to which you agree

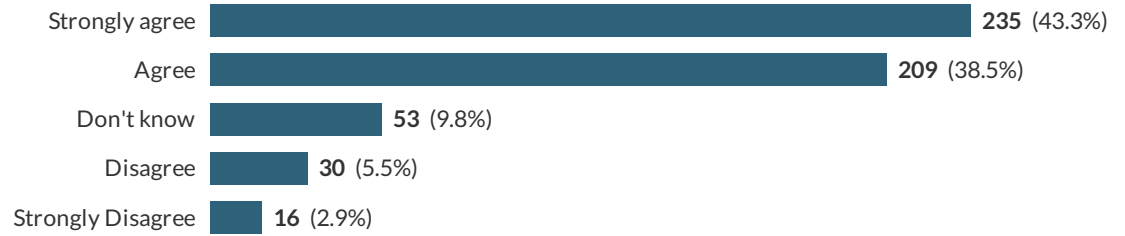

## Section 3: The best ways of providing foot health education

**9** Have you ever received education or information about how to care for your feet because of your RA?

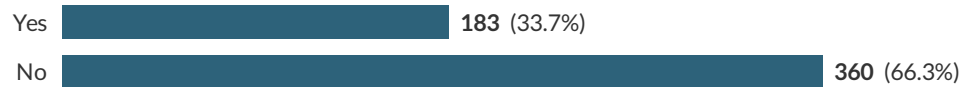

**10** If you answered YES' to question 9 and have received any form of foot health information/education, please indicate which types and from whom via the tick box below. Tick all that apply.

### 10.1 Written Information

**10.1.a** Written Information - Tick the boxes for each type of education you have received and indicate who you received it from according to the options in the right hand columns.

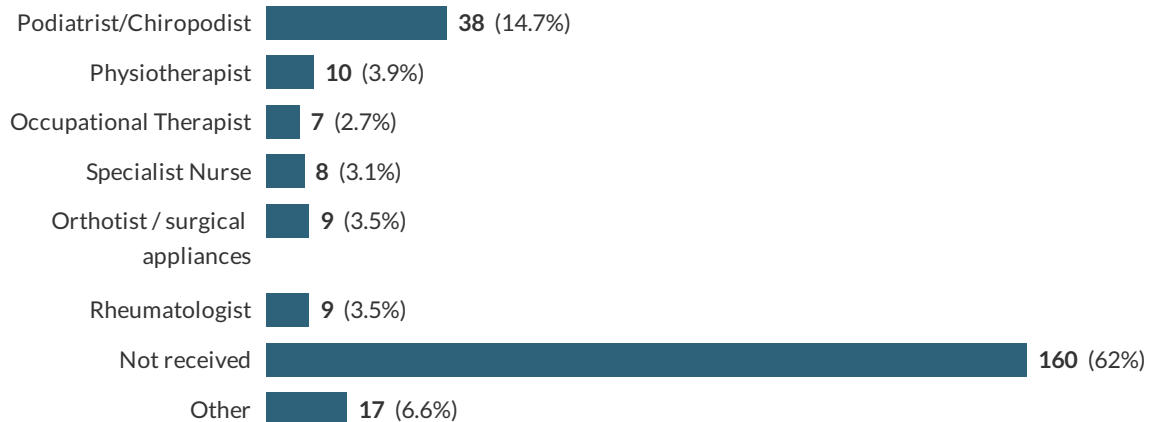

**10.1.b** Written Information - If you selected Other, please specify:

| Showing 5 of 17 responses                  |                       |
|--------------------------------------------|-----------------------|
| picked the leaflet up myself from hospital | 120841-120835-6761313 |
| Arthritis charity website                  | 120841-120835-6761354 |
| Internet                                   | 120841-120835-6761450 |
| leaflet                                    | 120841-120835-6761655 |
| I downloaded from NRAS site                | 120841-120835-6761668 |

## 10.2 Verbal Information

**10.2.a** Verbal Information - Tick the boxes for each type of education you have received and indicate who you received it from according to the options in the right hand columns.

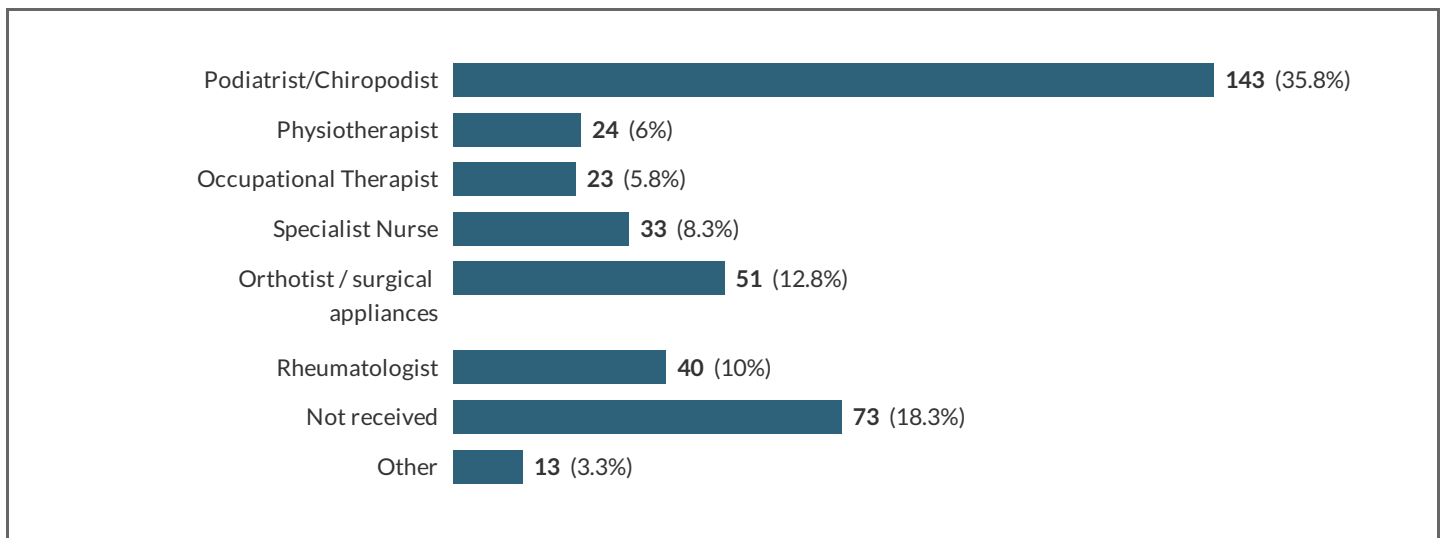

**10.2.b** Verbal Information - If you selected Other, please specify:

| Showing 5 of 13 responses          |                       |
|------------------------------------|-----------------------|
| foot and ankle orthopaedic surgeon | 120841-120835-6761305 |
| podiatrist                         | 120841-120835-6761370 |
| NRAS group                         | 120841-120835-6761425 |
| East Dorset NRAS group             | 120841-120835-6761488 |
| PRIVATE                            | 120841-120835-6761579 |

## 10.3 Group Education sessions

**10.3.a** Group Education sessions - Tick the boxes for each type of education you have received and indicate who you received it from according to the options in the right hand columns.

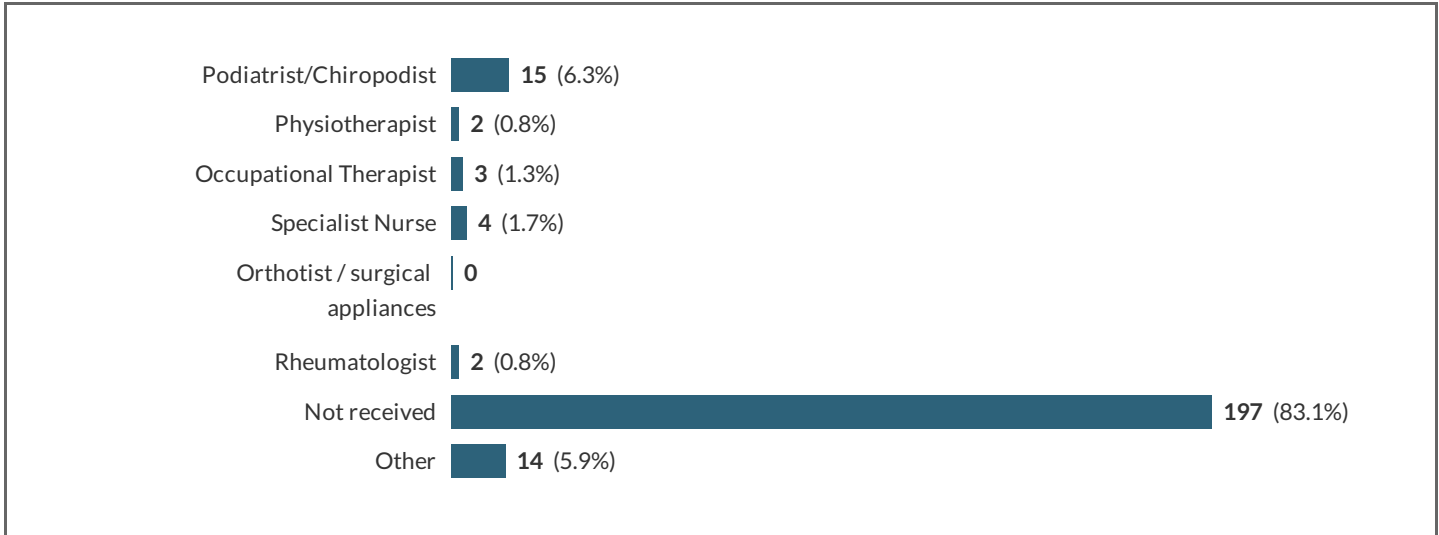

**10.3.b** Group Education sessions - If you selected Other, please specify:

| Showing 5 of 14 responses    |                                       |
|------------------------------|---------------------------------------|
| trained reflexologist        | <a href="#">120841-120835-6761318</a> |
| NRAS meeting                 | <a href="#">120841-120835-6761434</a> |
| NRAS group                   | <a href="#">120841-120835-6761425</a> |
| NRAS info day about footcare | <a href="#">120841-120835-6761454</a> |
| East Dorset NRAS group       | <a href="#">120841-120835-6761488</a> |

**10.4** Audiovisual aids such as short videos or DVD's

**10.4.a** Audiovisual aids such as short videos or DVD's - Tick the boxes for each type of education you have received and indicate who you received it from according to the options in the right hand columns.

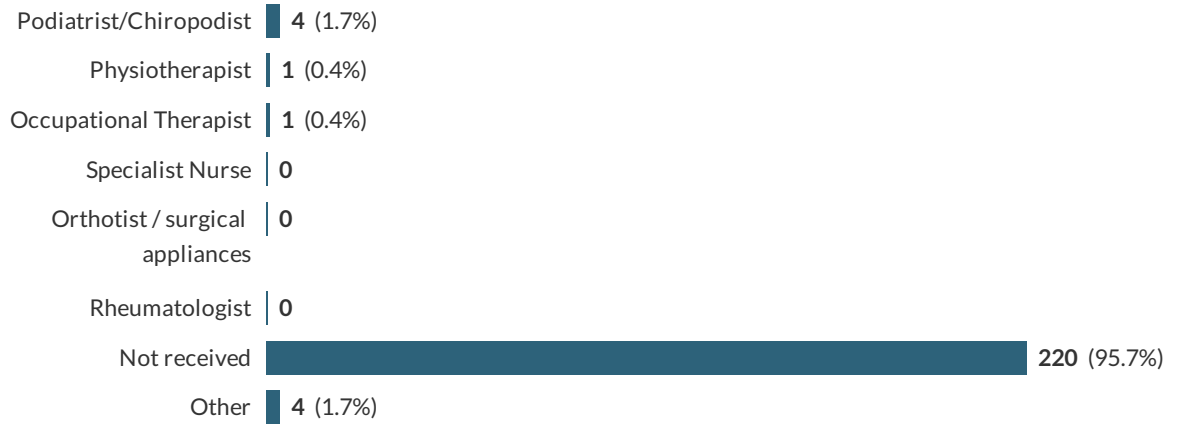

**10.4.b** Audiovisual aids such as short videos or DVD's - If you selected Other, please specify:

| Showing all 4 responses             |                       |
|-------------------------------------|-----------------------|
| Yes from American arthritis website | 120841-120835-6761354 |
| Internet                            | 120841-120835-6761450 |
| Web site on own PC                  | 120841-120835-6761738 |
| can't find/remember                 | 120841-120835-6761764 |

**10.5** Audiovisual aids such as demonstrations of how to care for your feet

**10.5.a** Audiovisual aids such as demonstrations of how to care for your feet - Tick the boxes for each type of education you have received and indicate who you received it from according to the options in the right hand columns.

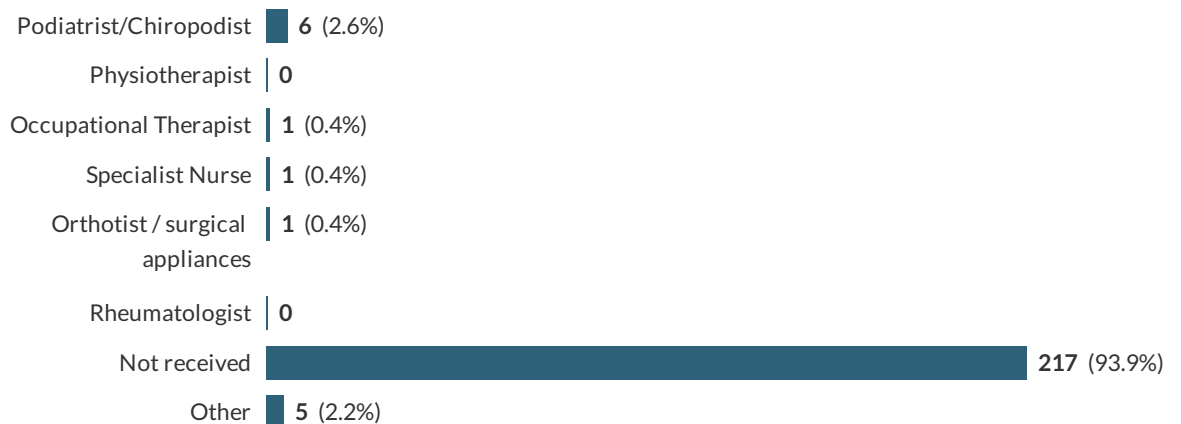



**10.5.b** Audiovisual aids such as demonstrations of how to care for your feet - If you selected Other, please specify:

| Showing all 5 responses      |                                       |
|------------------------------|---------------------------------------|
| NRAS meetings                | <a href="#">120841-120835-6761434</a> |
| Internet                     | <a href="#">120841-120835-6761450</a> |
| NRAS info day about footcare | <a href="#">120841-120835-6761454</a> |
| as above                     | <a href="#">120841-120835-6761738</a> |
| as above                     | <a href="#">120841-120835-6761764</a> |

**10.6** Audiovisual aids such as pictures of footwear/insoles or images of feet

**10.6.a** Audiovisual aids such as pictures of footwear/insoles or images of feet - Tick the boxes for each type of education you have received and indicate who you received it from according to the options in the right hand columns.

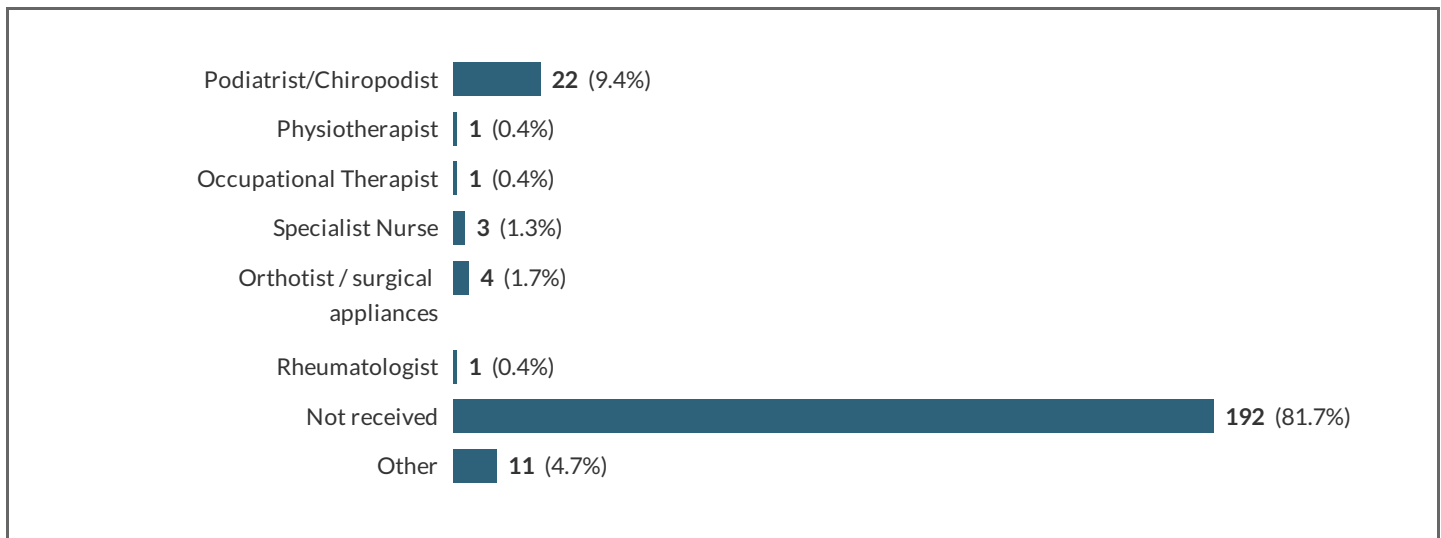

**10.6.b** Audiovisual aids such as pictures of footwear/insoles or images of feet - If you selected Other, please specify:

| Showing 5 of 11 responses               |                                       |
|-----------------------------------------|---------------------------------------|
| Arthritis charity website               | <a href="#">120841-120835-6761354</a> |
| NRAS meetings                           | <a href="#">120841-120835-6761434</a> |
| Internet                                | <a href="#">120841-120835-6761450</a> |
| NRAS info day about footcare            | <a href="#">120841-120835-6761454</a> |
| York rheumatoid arthritis support group | <a href="#">120841-120835-6761605</a> |

10.7 Been given information about websites such as NRAS, Arthritis Care, Arthritis Research UK

10.7.a Been given information about websites such as NRAS, Arthritis Care, Arthritis Research UK - Tick the boxes for each type of education you have received and indicate who you received it from according to the options in the right hand columns.

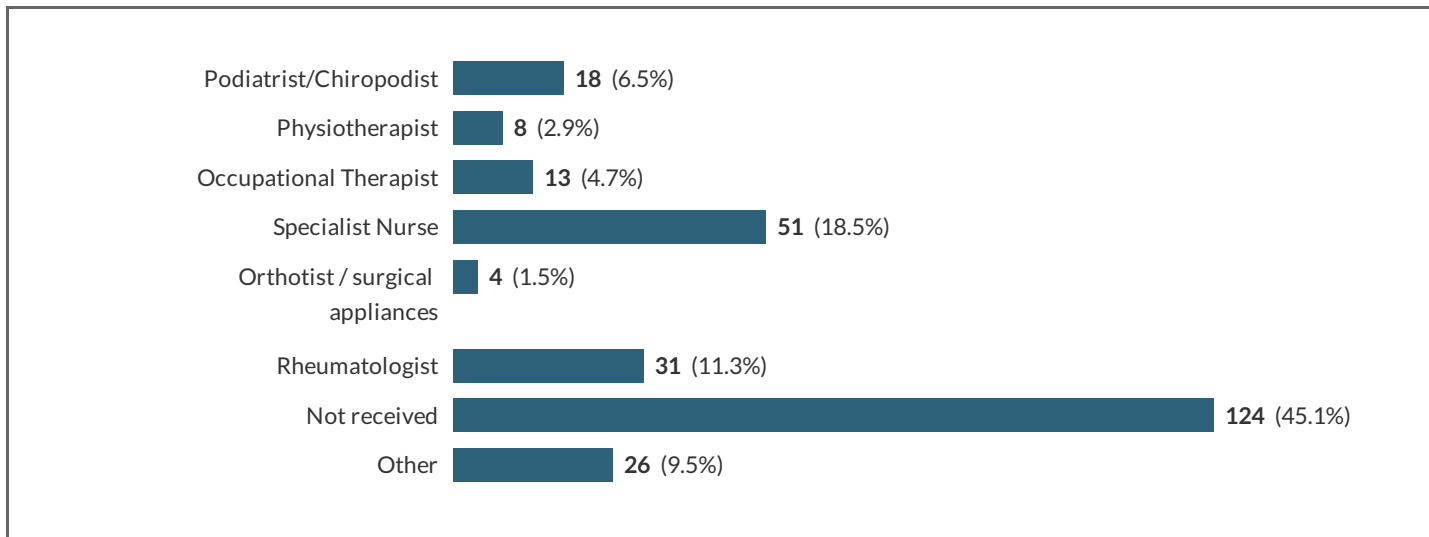

10.7.b Been given information about websites such as NRAS, Arthritis Care, Arthritis Research UK - If you selected Other, please specify:

| Showing 5 of 26 responses                          |                                       |
|----------------------------------------------------|---------------------------------------|
| Healthcare @ Home nurses who delivers my anti-TNFs | <a href="#">120841-120835-6761305</a> |
| Internet search                                    | <a href="#">120841-120835-6761314</a> |
| self help                                          | <a href="#">120841-120835-6761318</a> |
| found it myself                                    | <a href="#">120841-120835-6761346</a> |
| From a friend                                      | <a href="#">120841-120835-6761396</a> |

11 To what extent do you think these methods of education are effective, in relation to your foot health?

11.1 Verbal Information

11.1.a Verbal Information - Please select from Very Effective to Don't KNow

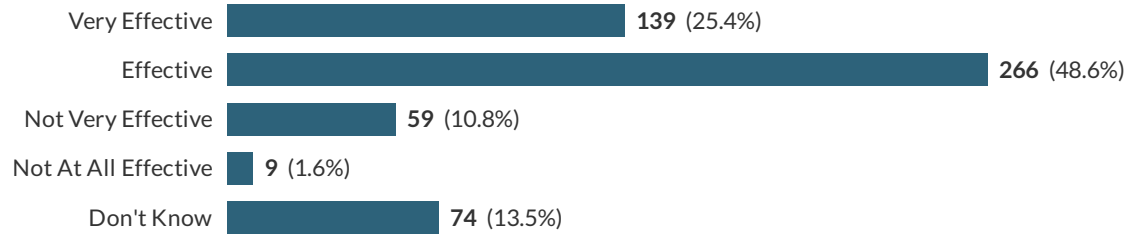

## 11.2 Written Information

### 11.2.a Written Information - Please select from Very Effective to Don't KNow

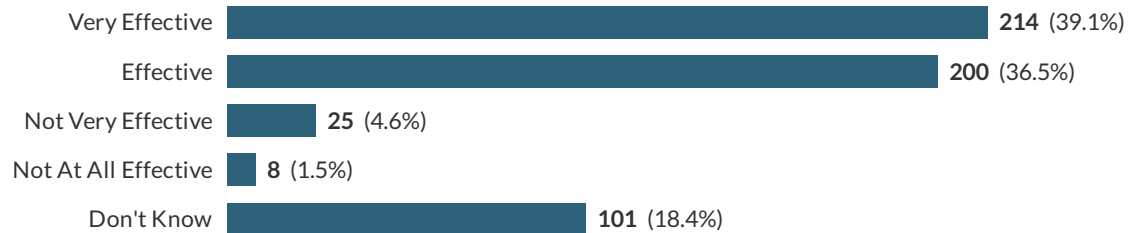

## 11.3 Group Education sessions

### 11.3.a Group Education sessions - Please select from Very Effective to Don't KNow

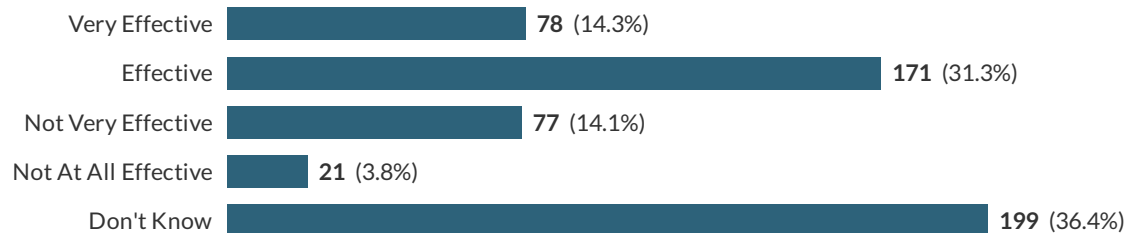

## 11.4 Audio-visual aids such as videos/demonstrations

### 11.4.a Audio-visual aids such as videos/demonstrations - Please select from Very Effective to Don't KNow

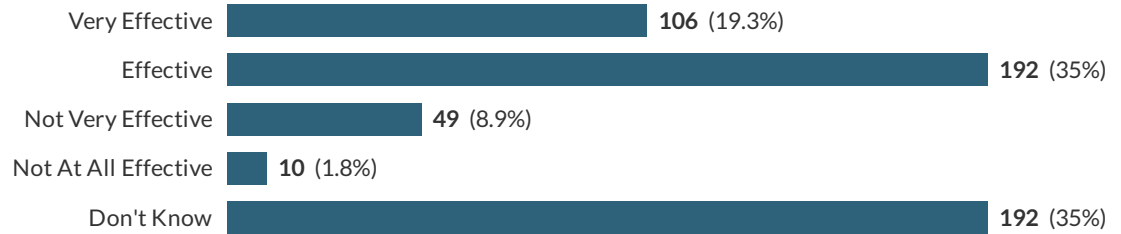

11.5 Web sites

11.5.a Web sites - Please select from Very Effective to Don't KNow

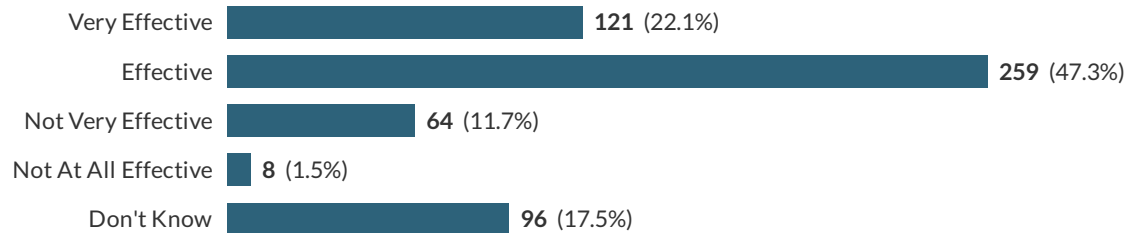

11.6 Other (in relation to additional methods you gave)

11.6.a Other (in relation to additional methods you gave) - Please select from Very Effective to Don't KNow

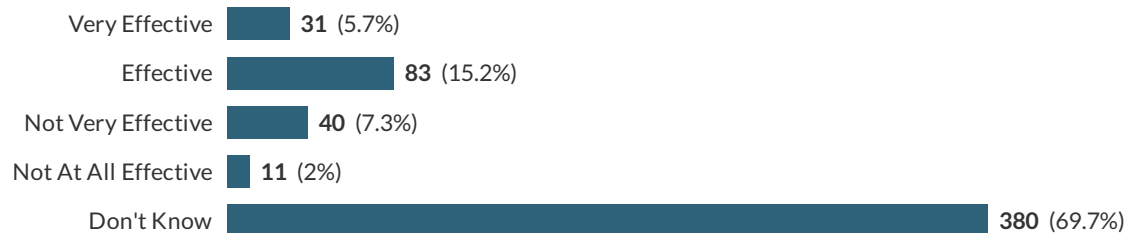

Section 4: What should be included in foot health education provision?

12 To what extent do you think it is important for people with RA to know about the following areas of foot health education? Select from Very Important to Not Important for each item. They are in no particular order.

12.1 The role of the podiatrist/chiropracist in looking after my foot health

**12.1.a** The role of the podiatrist/chiropracist in looking after my foot health - Please select from Very Important to Not Important

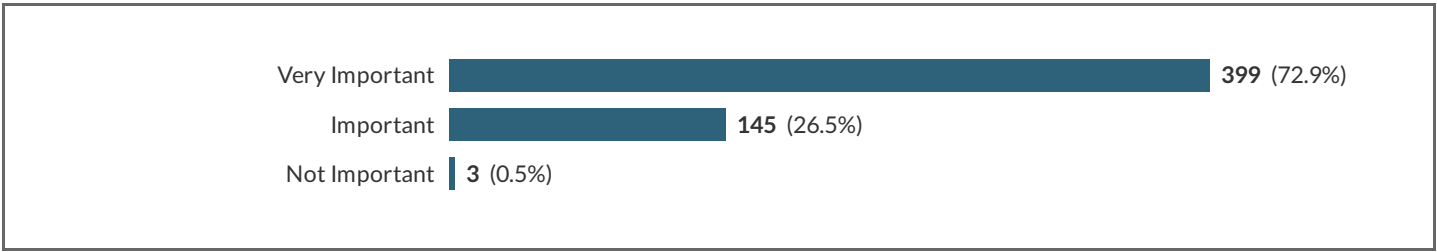

**12.2** General disease related information (e.g what is RA? Causes etc..)

**12.2.a** General disease related information (e.g what is RA? Causes etc..) - Please select from Very Important to Not Important

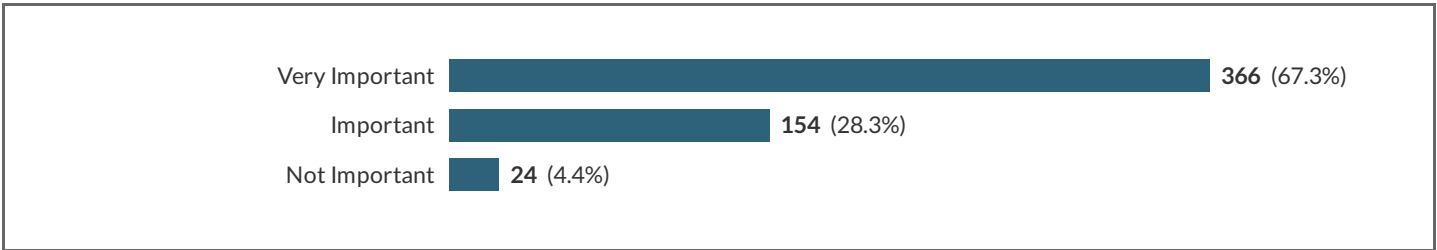

**12.3** Information about how the medication I take for RA can affect my feet

**12.3.a** Information about how the medication I take for RA can affect my feet - Please select from Very Important to Not Important

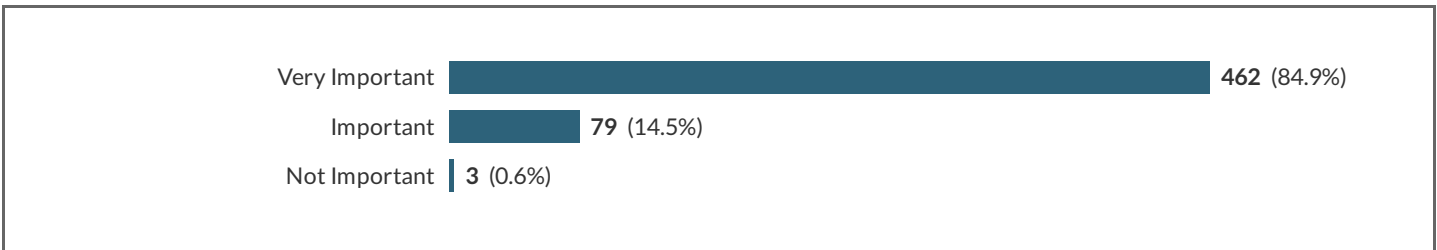

**12.4** How RA affects the feet

**12.4.a** How RA affects the feet - Please select from Very Important to Not Important

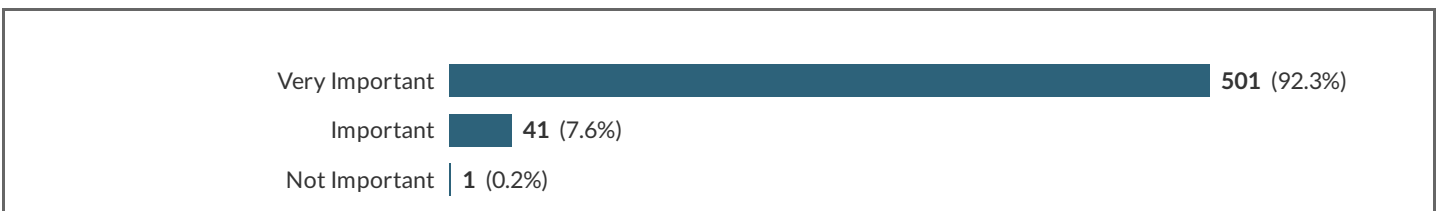

12.5 Contact details for podiatry/chiropractic services (what is an emergency, how and who to contact)

12.5.a Contact details for podiatry/chiropractic services (what is an emergency, how and who to contact) - Please select from Very Important to Not Important

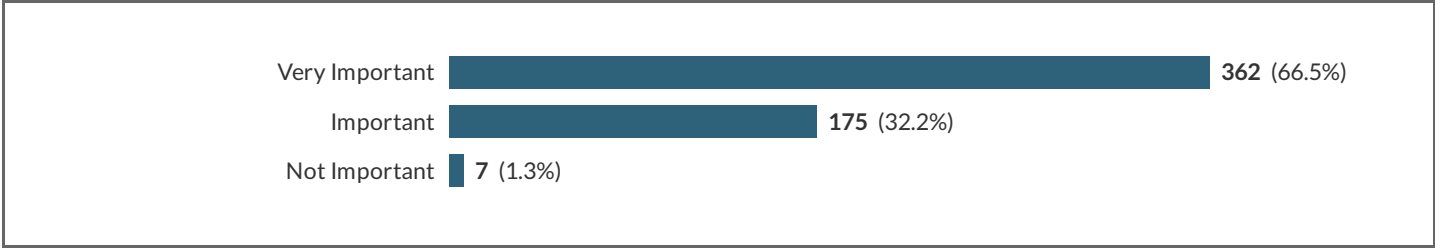

12.6 The different kinds of treatment I can have to help me with my foot problems

12.6.a The different kinds of treatment I can have to help me with my foot problems - Please select from Very Important to Not Important

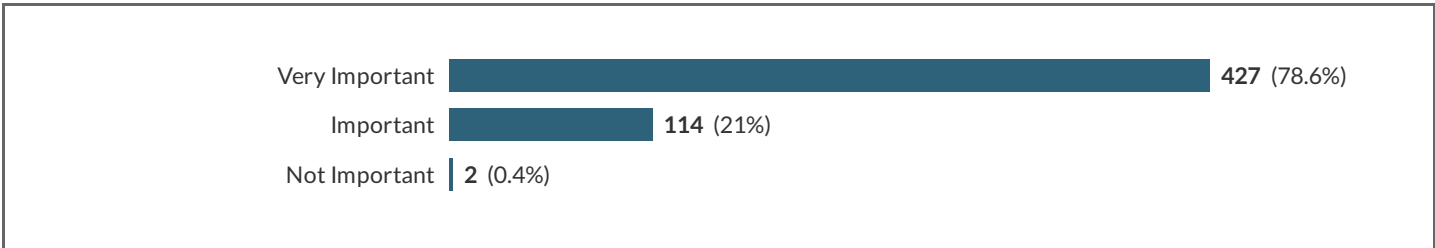

12.7 How to look after my own foot health (footwear advice, how to cut nails safely, use of moisturiser..)

12.7.a How to look after my own foot health (footwear advice, how to cut nails safely, use of moisturiser..) - Please select from Very Important to Not Important

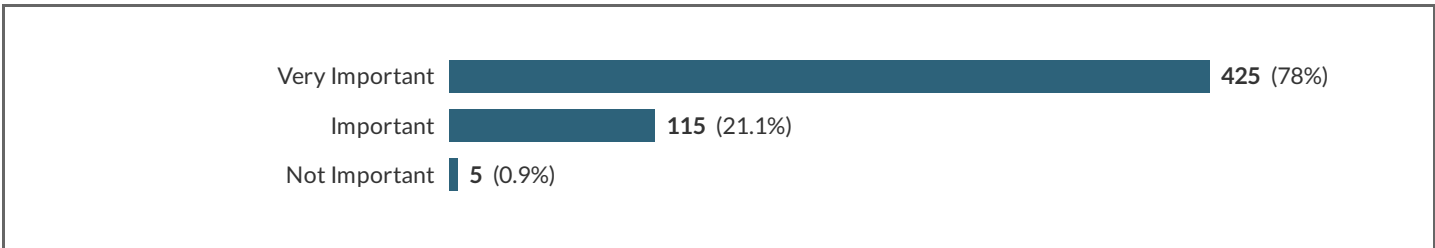

12.8 What might happen if I don't look after my feet

12.8.a What might happen if I don't look after my feet - Please select from Very Important to Not Important

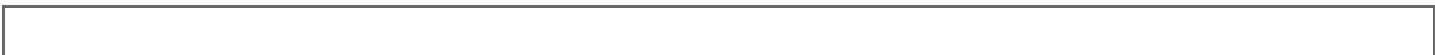

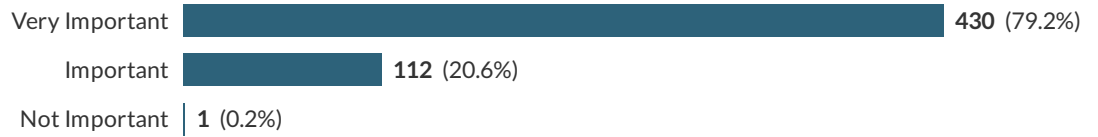

12.9 How other health professionals might be involved in looking after my feet.

12.9.a How other health professionals might be involved in looking after my feet. - Please select from Very Important to Not Important

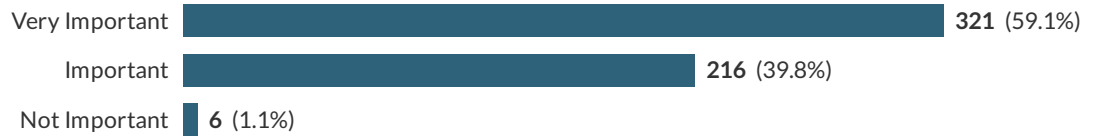

12.10 Information relating to Patient support groups/resources such as websites (e.g NRAS, Arthritis Care)

12.10.a Information relating to Patient support groups/resources such as websites (e.g NRAS, Arthritis Care) - Please select from Very Important to Not Important

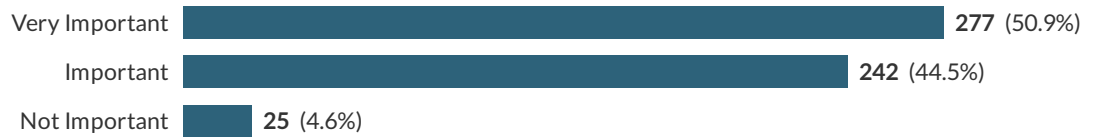

## Section 5: When is the best time to receive foot health education?

13 When do you think is the best time for you to be given foot health education relating to RA? Select all that you think apply.

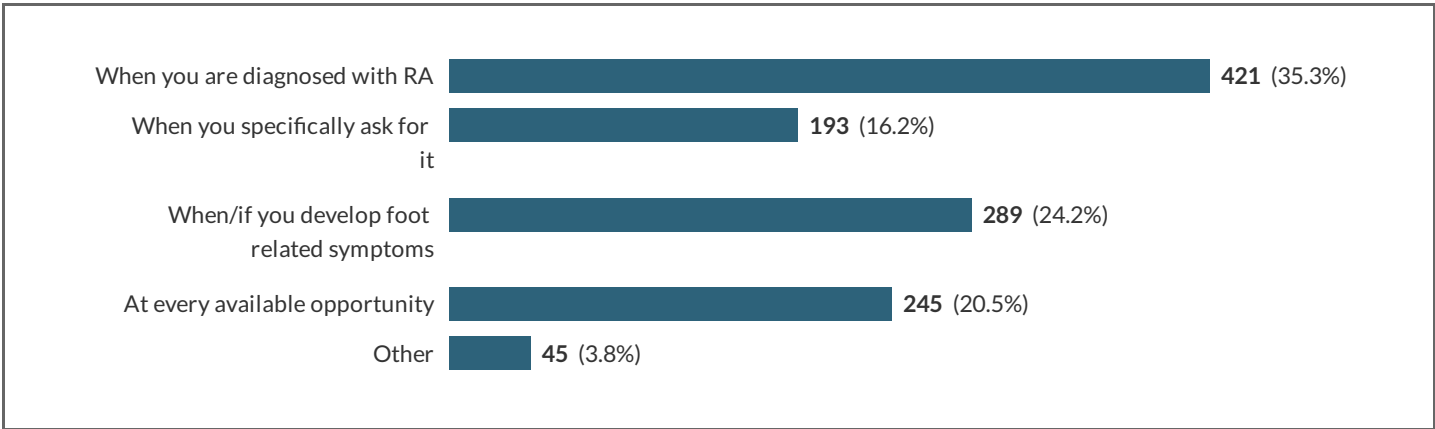

13.a If you selected Other, please specify:

| Showing 5 of 45 responses                                                                                                                                                                                                           |                                       |
|-------------------------------------------------------------------------------------------------------------------------------------------------------------------------------------------------------------------------------------|---------------------------------------|
| I think the specialist nurses and consultants should take my foot pain much more seriously. I told them I had very painful lumps under my feet, they shrug and say nodules. But what are nodules, what can they do for me? No idea. | <a href="#">120841-120835-6761308</a> |
| I now suffer from a limp from a badly managed Achilles tendon rupture. Never offered any supports which may have protected my ankle from the forementioned damage.                                                                  | <a href="#">120841-120835-6761318</a> |
| Perhaps automatically at annual review appointments.<br>There is a lot to take in at point of diagnosis, so perhaps again after 3 & 6 months initially.                                                                             | <a href="#">120841-120835-6761321</a> |
| it seems not taken into account                                                                                                                                                                                                     | <a href="#">120841-120835-6761341</a> |
| When the diagnosis has had time to sink in - there is so much to take in at the beginning, I think foot health education would not be appropriate then.                                                                             | <a href="#">120841-120835-6761346</a> |

## Section 6: Accessing foot health education

14 To what extent do you agree with the following statements? Select one response for each item.

14.1 I am clear about what questions to ask my podiatrist or other health professional regarding my foot health

14.1.a I am clear about what questions to ask my podiatrist or other health professional regarding my foot health - Please select from Strongly Agree to Strongly Disagree for each item. If you are unsure please select 'Don't Know'. There is space in the final column for each item if you wish to add any other comment.



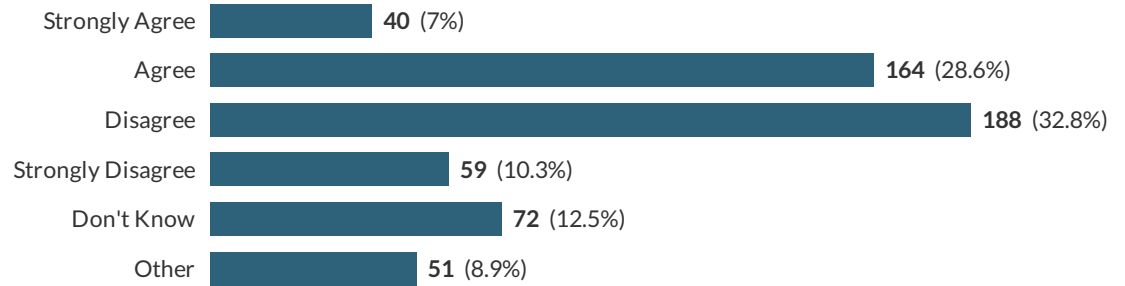

**14.1.b** I am clear about what questions to ask my podiatrist or other health professional regarding my foot health - If you selected Other, please specify:

| Showing 5 of 51 responses                                                                                                        |                                       |
|----------------------------------------------------------------------------------------------------------------------------------|---------------------------------------|
| Don't really know what the podiatrist does                                                                                       | <a href="#">120841-120835-6761308</a> |
| Never offered services                                                                                                           | <a href="#">120841-120835-6761318</a> |
| Have never had an appointment                                                                                                    | <a href="#">120841-120835-6761353</a> |
| No offer of referral to podiatry. Never referred to at Rhumatology appointments. All they are interested in is x-raying my feet! | <a href="#">120841-120835-6761354</a> |
| Not applicable at this time                                                                                                      | <a href="#">120841-120835-6761363</a> |

**14.2** There is enough time during my appointment with the chiropodist/podiatrist to ask questions about foot health education

**14.2.a** There is enough time during my appointment with the chiropodist/podiatrist to ask questions about foot health education - Please select from Strongly Agree to Strongly Disagree for each item. If you are unsure please select 'Don't Know'. There is space in the final column for each item if you wish to add any other comment.

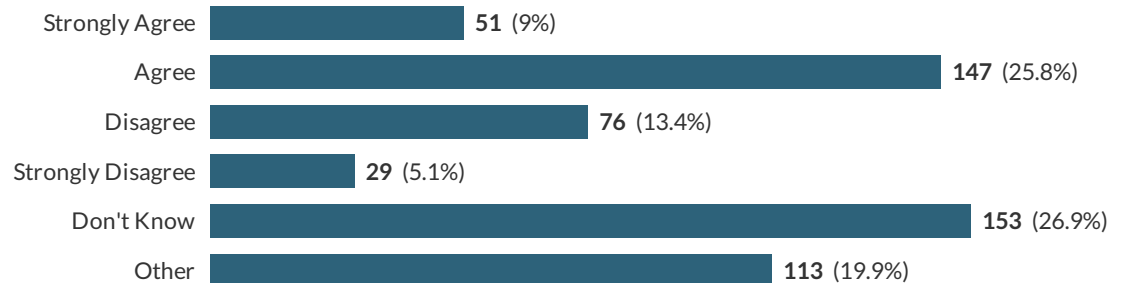

**14.2.b** There is enough time during my appointment with the chiropodist/podiatrist to ask questions about foot health education - If you selected Other, please specify:

| Showing 5 of 113 responses                              |                                       |
|---------------------------------------------------------|---------------------------------------|
| I have no foot care offered                             | <a href="#">120841-120835-6761307</a> |
| N/A have not been offered podiatry/chiropractic support | <a href="#">120841-120835-6761309</a> |
| I've never been offered an appointment                  | <a href="#">120841-120835-6761316</a> |
| Not been                                                | <a href="#">120841-120835-6761327</a> |
| have not been offered podiatry care                     | <a href="#">120841-120835-6761331</a> |

### 14.3 My podiatrist/chiropractor asks about my foot health concerns during my appointment

**14.3.a** My podiatrist/chiropractor asks about my foot health concerns during my appointment - Please select from Strongly Agree to Strongly Disagree for each item. If you are unsure please select 'Don't Know'. There is space in the final column for each item if you wish to add any other comment.

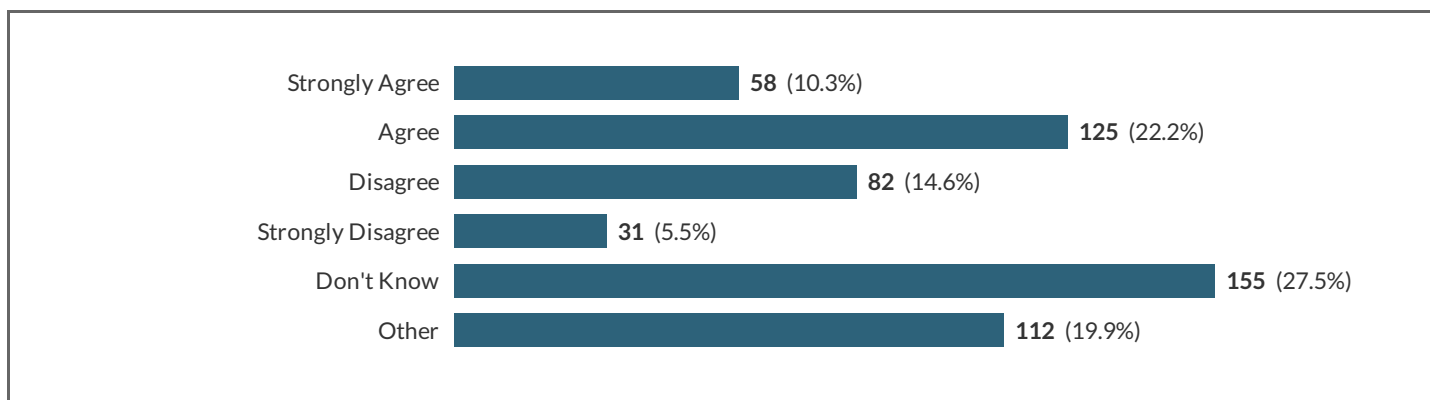

**14.3.b** My podiatrist/chiropractor asks about my foot health concerns during my appointment - If you selected Other, please specify:

| Showing 5 of 112 responses                                                                                 |                                       |
|------------------------------------------------------------------------------------------------------------|---------------------------------------|
| I have no foot care offered                                                                                | <a href="#">120841-120835-6761307</a> |
| He won't do anything though as I am "in a flare" but I think that's exactly when I need help with my feet. | <a href="#">120841-120835-6761308</a> |
| N/A have not been offered podiatry/chiropractic support                                                    | <a href="#">120841-120835-6761309</a> |
| I don't have one                                                                                           | <a href="#">120841-120835-6761316</a> |
| Never offered services.                                                                                    | <a href="#">120841-120835-6761318</a> |

### 14.4 Other Health Professionals (such as the Specialist Nurse, Physio, Occupational Therapist or Consultant) ask about my feet during my appointment

**14.4.a** Other Health Professionals (such as the Specialist Nurse, Physio, Occupational Therapist or Consultant) ask about

my feet during my appointment - Please select from Strongly Agree to Strongly Disagree for each item. If you are unsure please select 'Don't Know'. There is space in the final column for each item if you wish to add any other comment.

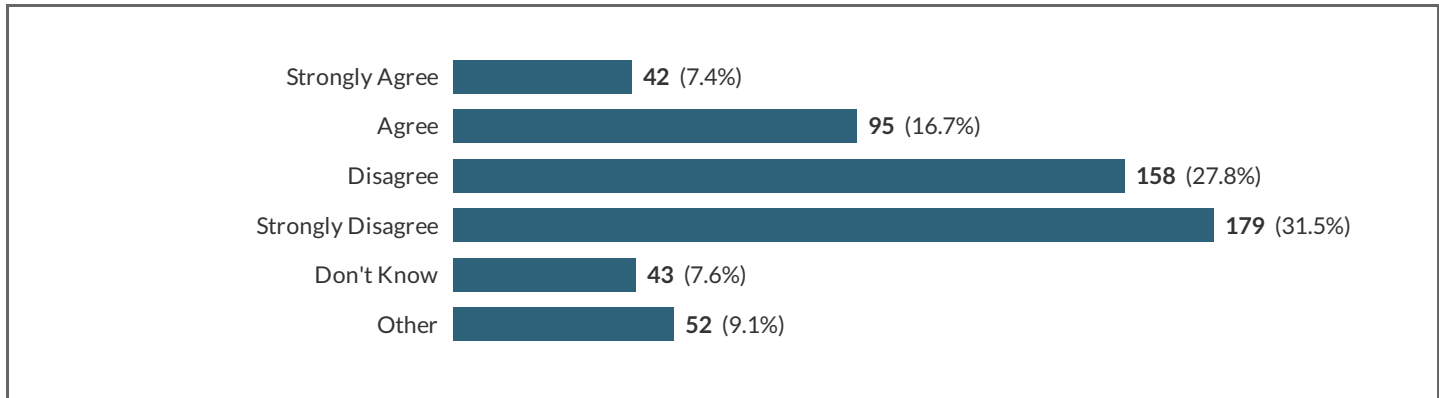

**14.4.b** Other Health Professionals (such as the Specialist Nurse, Physio, Occupational Therapist or Consultant)ask about my feet during my appointment - If you selected Other, please specify:

| Showing 5 of 52 responses                                                                   |                                       |
|---------------------------------------------------------------------------------------------|---------------------------------------|
| Only if I bring up my concerns re: foot health.                                             | <a href="#">120841-120835-6761305</a> |
| Really feel they aren't bothered as its not in the DAS score, therefore not a high priority | <a href="#">120841-120835-6761308</a> |
| Recently spoke to a physio who advised on foot wear.                                        | <a href="#">120841-120835-6761318</a> |
| Occupational therapist sometimes asks but I was referred to her about my hands              | <a href="#">120841-120835-6761336</a> |
| wife askes nurse about my feet                                                              | <a href="#">120841-120835-6761360</a> |

**14.5** I have received written foot health information from my Podiatrist or other Health Professional

**14.5.a** I have received written foot health information from my Podiatrist or other Health Professional - Please select from Strongly Agree to Strongly Disagree for each item. If you are unsure please select 'Don't Know'. There is space in the final column for each item if you wish to add any other comment.

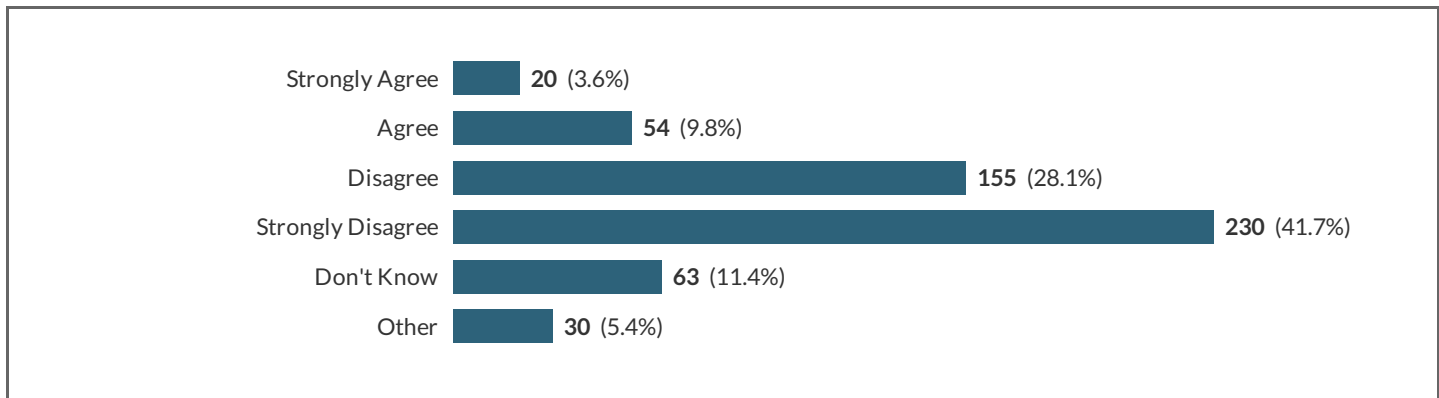

**14.5.b** I have received written foot health information from my Podiatrist or other Health Professional - If you selected

Other, please specify:

| Showing 5 of 30 responses                                          |                                       |
|--------------------------------------------------------------------|---------------------------------------|
| Not been                                                           | <a href="#">120841-120835-6761327</a> |
| I never knew it existed will start looking as my feet are very bad | <a href="#">120841-120835-6761353</a> |
| only on inserts for my shoes                                       | <a href="#">120841-120835-6761360</a> |
| Not applicable at this time                                        | <a href="#">120841-120835-6761363</a> |
| no information received                                            | <a href="#">120841-120835-6761435</a> |

14.6 I have received or found information myself relating to RA and foot health, but found it difficult to understand

14.6.a I have received or found information myself relating to RA and foot health, but found it difficult to understand - Please select from Strongly Agree to Strongly Disagree for each item. If you are unsure please select 'Don't Know'. There is space in the final column for each item if you wish to add any other comment.

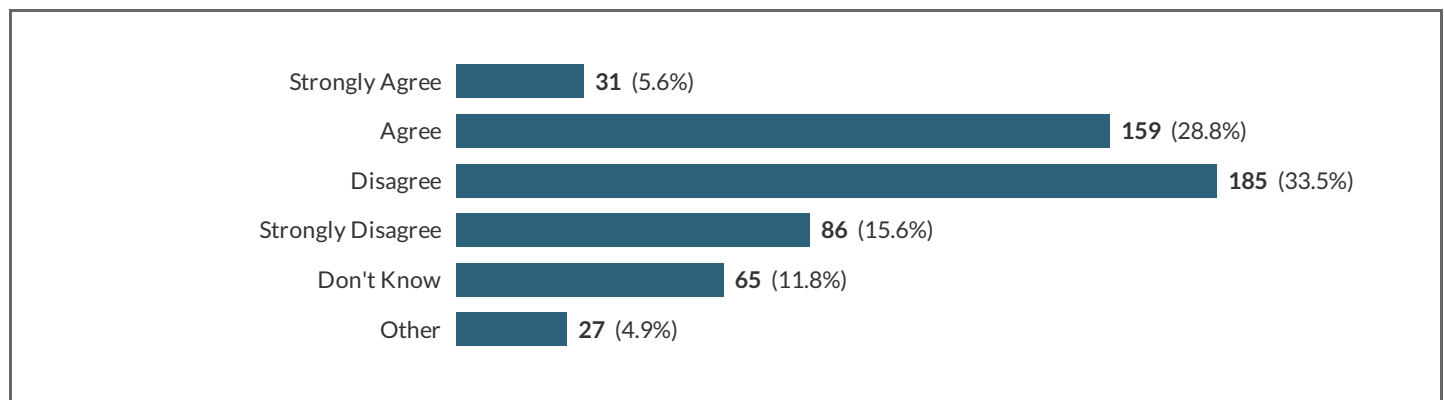

14.6.b I have received or found information myself relating to RA and foot health, but found it difficult to understand - If you selected Other, please specify:

| Showing 5 of 27 responses                                                                                                                      |                                       |
|------------------------------------------------------------------------------------------------------------------------------------------------|---------------------------------------|
| This is the first I've heard of it                                                                                                             | <a href="#">120841-120835-6761316</a> |
| NRAS information                                                                                                                               | <a href="#">120841-120835-6761321</a> |
| I found the info myself & found it easy to understand, but I am a Nurse Educator with RA.                                                      | <a href="#">120841-120835-6761354</a> |
| Didn't know there was any. Didn't know I should be concerned about my feet.                                                                    | <a href="#">120841-120835-6761378</a> |
| I sent for info about foot surgery from bras, which was interesting and not particularly hard to understand it was however, rather out of date | <a href="#">120841-120835-6761396</a> |

14.7 I know where I can access written foot health information (such as a leaflet or from websites such as NRAS)

**14.7.a** I know where I can access written foot health information (such as a leaflet or from websites such as NRAS) - Please select from Strongly Agree to Strongly Disagree for each item. If you are unsure please select 'Don't Know'. There is space in the final column for each item if you wish to add any other comment.

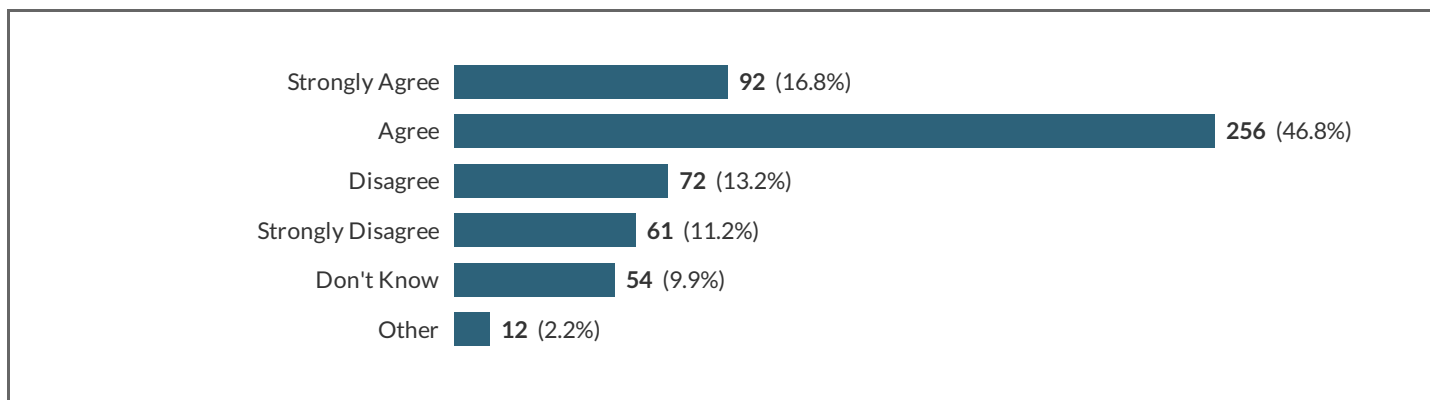

**14.7.b** I know where I can access written foot health information (such as a leaflet or from websites such as NRAS) - If you selected Other, please specify:

| Showing 5 of 12 responses                                                                                                           |                                       |
|-------------------------------------------------------------------------------------------------------------------------------------|---------------------------------------|
| one would only think about foot health information and how to go about it once there was a problem, first stop would probably be GP | <a href="#">120841-120835-6761419</a> |
| Need to get someone to access information for me.                                                                                   | <a href="#">120841-120835-6761458</a> |
| I know where the local Poidiatrist clinics are held.                                                                                | <a href="#">120841-120835-6761476</a> |
| As above.                                                                                                                           | <a href="#">120841-120835-6761379</a> |
| As above                                                                                                                            | <a href="#">120841-120835-6761549</a> |

**14.8** I am able to access the Internet or someone does it for me

**14.8.a** I am able to access the Internet or someone does it for me - Please select from Strongly Agree to Strongly Disagree for each item. If you are unsure please select 'Don't Know'. There is space in the final column for each item if you wish to add any other comment.

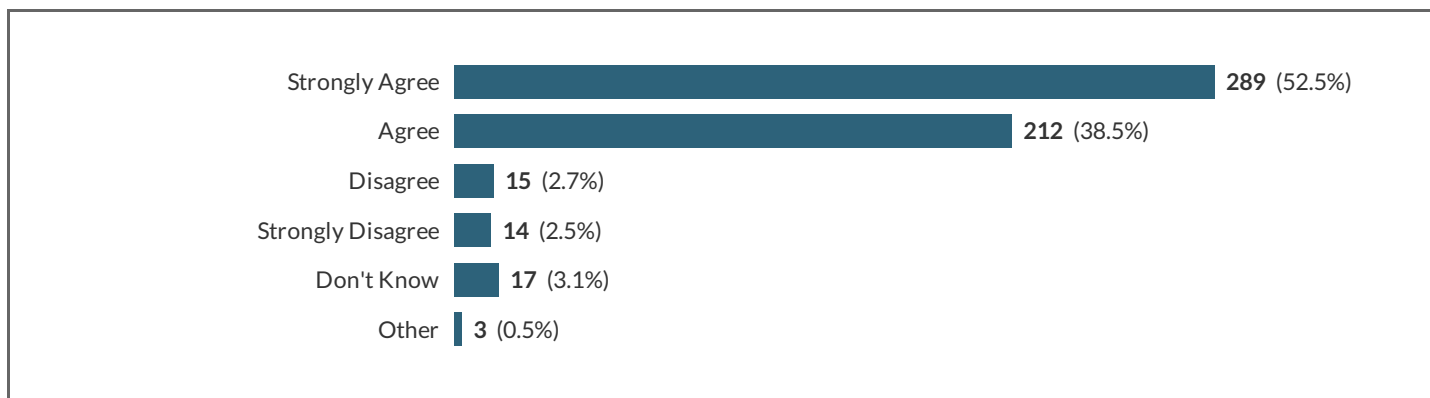

**14.8.b** I am able to access the Internet or someone does it for me - If you selected Other, please specify:

| Showing all 3 responses      |                                       |
|------------------------------|---------------------------------------|
| Yes have access to Internet. | <a href="#">120841-120835-6761379</a> |
| As above                     | <a href="#">120841-120835-6761549</a> |
| Myself.                      | <a href="#">120841-120835-6761764</a> |

**14.9** I cannot afford the time to attend patient support group meetings

**14.9.a** I cannot afford the time to attend patient support group meetings - Please select from Strongly Agree to Strongly Disagree for each item. If you are unsure please select 'Don't Know'. There is space in the final column for each item if you wish to add any other comment.

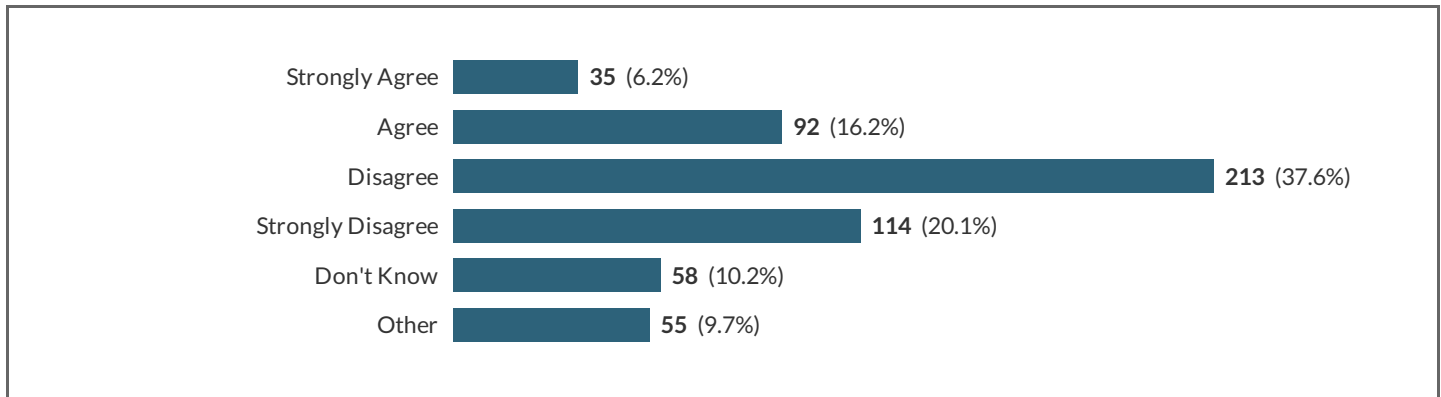

**14.9.b** I cannot afford the time to attend patient support group meetings - If you selected Other, please specify:

| Showing 5 of 55 responses                                                                                                                      |                                       |
|------------------------------------------------------------------------------------------------------------------------------------------------|---------------------------------------|
| Also it's very painful to get to meetings due to sore joints and painful feet. The rheumatology department is at the back of the hospital too. | <a href="#">120841-120835-6761308</a> |
| The times are what prevent me from attending                                                                                                   | <a href="#">120841-120835-6761310</a> |
| I can now since taking voluntary retirement.                                                                                                   | <a href="#">120841-120835-6761318</a> |
| I cannot attend on my own, so it would involve another person's time.                                                                          | <a href="#">120841-120835-6761321</a> |
| not been offered these                                                                                                                         | <a href="#">120841-120835-6761341</a> |

**14.10** I cannot afford the money to attend patient support group meetings

**14.10.a** I cannot afford the money to attend patient support group meetings - Please select from Strongly Agree to Strongly Disagree for each item. If you are unsure please select 'Don't Know'. There is space in the final column for each item if you wish to add any other comment.

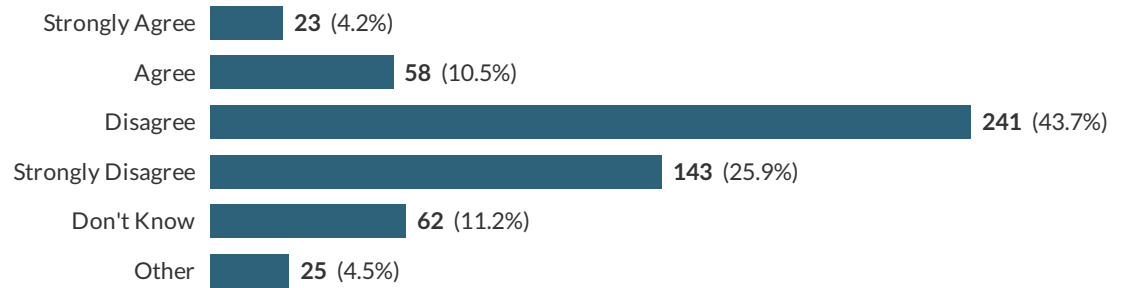

**14.10.b** I cannot afford the money to attend patient support group meetings - If you selected Other, please specify:

| Showing 5 of 25 responses                                                                            |                                       |
|------------------------------------------------------------------------------------------------------|---------------------------------------|
| There are no patient support groups here that I can access - all require a car and I don't have one! | <a href="#">120841-120835-6761326</a> |
| as above                                                                                             | <a href="#">120841-120835-6761341</a> |
| see above                                                                                            | <a href="#">120841-120835-6761346</a> |
| I don't know if there are any?                                                                       | <a href="#">120841-120835-6761377</a> |
| doesn't cost money                                                                                   | <a href="#">120841-120835-6761404</a> |

**15** If you use the internet to get foothealth information, which websites do you most frequently use? please select all that apply and add any other website that we may not have included in the 'other' box.

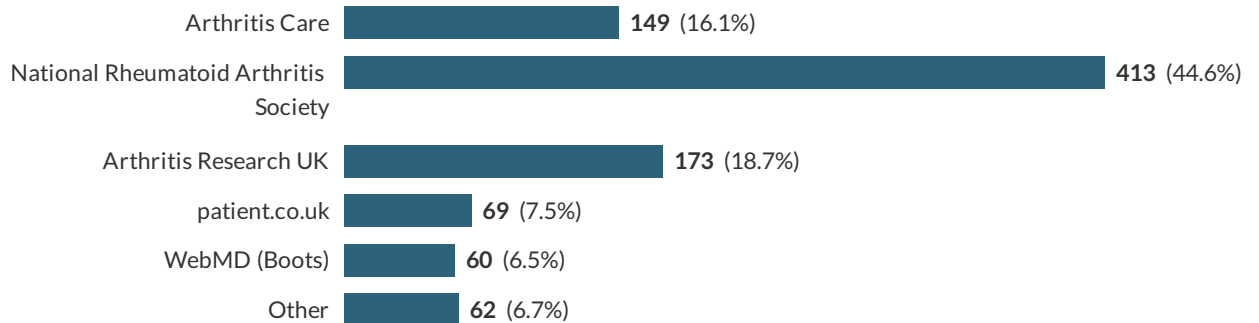

**15.a** If you selected Other, please specify:

| Showing 5 of 62 responses                                                                                             |                                       |
|-----------------------------------------------------------------------------------------------------------------------|---------------------------------------|
| I Google my problem and see what comes up.                                                                            | <a href="#">120841-120835-6761312</a> |
| I didn't know that you had to take care of your feet. With my feet changing shape it would of been good to have known | <a href="#">120841-120835-6761316</a> |
| Amazon for specialist products.                                                                                       | <a href="#">120841-120835-6761318</a> |
| Health Unlocked                                                                                                       | <a href="#">120841-120835-6761326</a> |
| I try any and all websites although I find the US ones a bit sensational.                                             | <a href="#">120841-120835-6761335</a> |

**16** This free text box is for you to add any additional comments or information that you feel is relevant and has not been addressed by this survey. Thank you.

| Showing 5 of 249 responses                                                                                                                                                                                                                                                          |                                       |
|-------------------------------------------------------------------------------------------------------------------------------------------------------------------------------------------------------------------------------------------------------------------------------------|---------------------------------------|
| I have had a letter today from my GP offering this service                                                                                                                                                                                                                          | <a href="#">120841-120835-6761307</a> |
| I have extremely painful feet and no one takes any notice of my feet pain as it isn't included in my DAS score, so they are not bothered. But for my pain and quality of life it is the biggest thing! Also I was give a pair of thin insoles by a friend hitch are pretty useless. | <a href="#">120841-120835-6761308</a> |
| Question 11 is ambiguous (as far as I understand) if Question 10 doesn't apply. Particularly Question 11f but the survey says these questions are mandatory. This seems to be a confusing and poorly designed survey for the user.                                                  | <a href="#">120841-120835-6761309</a> |
| Feet are of little interest to the RA professionals. My feet seem to cause me a lot of trouble, but there is no obvious person to ask.                                                                                                                                              | <a href="#">120841-120835-6761312</a> |
| I don't think enough information/ advice is given during appointments (my experience only) and I have always had to raise the subject myself.                                                                                                                                       | <a href="#">120841-120835-6761314</a> |
